# Supplementary material for: A tissue-specific role for intraflagellar transport genes during craniofacial development
Source: PLoS One. 2017 Mar 27;12(3):e0174206. doi: 10.1371/journal.pone.0174206 (PMC5367710; doi:10.1371/journal.pone.0174206)
Supplement: S1 Table — Average cell counts, standard deviation and P-values for PHH3 and CC3 staining in epithelial or mesenchymal tissues of FNPs and palatal sections at e11.5 and e14.5. Green boxes indicate significance. N’s refer to the number of sections counted across 3 separate embryos. (XLSX) [file pone.0174206.s006.xlsx]

## Sheet: e11.5
	Control e11.5
	PHH3 FNP (n=15)			CC3 FNP (n=14)			PHH3 Palate (n=10)			CC3 Palate (n=12)
	Total	Epithelum	Mesenchyme	Total	Epithelum	Mesenchyme	Total	Epithelum	Mesenchyme	Total	Epithelum	Mesenchyme
Average	69.7329	15.4518	54.2811	4.92953	2.75921	2.17031	113.271	29.1992	103.327	12.5724	6.02959	5.9186
STD	26.9368	6.09558	22.2873	3.4592	2.93466	1.25335	16.922	12.0375	44.6558	5.64841	4.45947	3.36458
P-value	N/A	N/A	N/A	N/A	N/A	N/A	N/A	N/A	N/A	N/A	N/A	N/A
	Kif3a;Wnt1-Cre e11.5
	PHH3 FNP (n=12)			CC3 FNP (n=17)			PHH3 Palate (n=20)			CC3 Palate (n=20)
	Total	Epithelum	Mesenchyme	Total	Epithelum	Mesenchyme	Total	Epithelum	Mesenchyme	Total	Epithelum	Mesenchyme
Average	41.6337	7.78106	33.8526	4.77915	0.654221	4.12493	115.065	41.0528	74.0117	46.6361	15.0423	33.138
STD	15.135	2.57356	13.8232	4.7814	0.57132	4.57797	35.5488	18.13	23.6243	8.07025	3.09907	8.73765
P-value	0.00236462	0.000280529	0.00718766	0.919946	0.0194669	0.108397	0.852882	0.0342321	0.0529167	0.767431	0.00902833	0.0294552
	Kif3a;Crect e11.5
	PHH3 FNP (n=12)			CC3 FNP (n=12)			PHH3 Palate (n=12)			CC3 Palate (n=13)
	Total	Epithelum	Mesenchyme	Total	Epithelum	Mesenchyme	Total	Epithelum	Mesenchyme	Total	Epithelum	Mesenchyme
Average	53.6389	9.86323	43.7757	21.7734	6.0211	15.7523	116.124	28.0045	88.1199	37.2892	26.9944	10.2948
STD	11.6848	1.51924	11.1216	10.8815	6.76101	4.95771	24.888	6.89617	21.6159	11.2598	11.4286	7.00576
P-value	0.0504204	0.00346961	0.122317	0.000193008	0.142482	7.31381e-07	0.747168	0.766869	0.301044	1.51774e-06	2.65905e-05	0.042308
	Kif3a;AP2-Cre e11.5
	PHH3 FNP (n=19)			CC3 FNP (n=13)			PHH3 Palate (n=17)			CC3 Palate (n=16)
	Total	Epithelum	Mesenchyme	Total	Epithelum	Mesenchyme	Total	Epithelum	Mesenchyme	Total	Epithelum	Mesenchyme
Average	58.1873	8.54475	49.6425	6.04612	0.68323	5.36289	100.401	26.8394	73.5616	20.7667	17.8919	2.87473
STD	25.2989	4.9668	21.9389	4.23942	0.387868	4.13695	25.9659	13.0371	16.9088	11.9785	12.5567	2.88159
P-value	0.208267	0.00142975	0.545506	0.462845	0.0205804	0.0182306	0.132149	0.619864	0.0461038	0.0214368	0.00350287	0.0369089
	IFT88;Wnt1-Cre e11.5
	PHH3 FNP (n=13)			CC3 FNP (n=12)			PHH3 Palate (n=12)			CC3 Palate (n=12)
	Total	Epithelum	Mesenchyme	Total	Epithelum	Mesenchyme	Total	Epithelum	Mesenchyme	Total	Epithelum	Mesenchyme
Average	95.7723	22.4246	73.3478	6.95427	3.27294	3.68134	147.839	37.8252	110.014	14.1311	4.96761	9.16353
STD	35.0413	7.60286	29.5924	6.22851	2.67856	3.82817	83.0045	21.2882	71.2532	15.1158	8.03102	8.90138
P-value	0.0401322	0.0122261	0.0693752	0.330973	0.647505	0.213319	0.184329	0.238077	0.786004	0.742873	0.446318	0.207951
	IFT88;Crect e11.5
	PHH3 FNP (n=16)			CC3 FNP (n=15)			PHH3 Palate (n=9)			CC3 Palate (n=13)
	Total	Epithelum	Mesenchyme	Total	Epithelum	Mesenchyme	Total	Epithelum	Mesenchyme	Total	Epithelum	Mesenchyme
Average	69.8533	9.95959	59.8937	811.18	103.34	707.84	203.146	53.3405	149.805	5.73804	0.858918	4.87912
STD	34.7597	5.47499	32.8341	752.997	92.3597	661.754	38.1909	15.3384	35.7173	4.47068	1.34603	4.44976
P-value	0.991451	0.0131272	0.578874	0.000653936	0.000564491	0.00067731	4.81733e-05	0.00143911	0.015902	0.00313617	0.000506419	0.678898
	IFT88;AP2-Cre e11.5
	PHH3 FNP (n=20)			CC3 FNP (n=20)			PHH3 Palate (n=15)			CC3 Palate (n=15)
	Total	Epithelum	Mesenchyme	Total	Epithelum	Mesenchyme	Total	Epithelum	Mesenchyme	Total	Epithelum	Mesenchyme
Average	55.6118	9.04056	46.5713	6.71654	1.75867	4.95787	127.978	33.3299	94.6479	7.62693	2.45156	5.17538
STD	26.2485	6.17517	21.0621	3.41753	1.07103	2.83604	42.598	9.97391	36.7938	4.26746	2.74826	4.09305
P-value	0.128873	0.0044169	0.300937	0.145195	0.240742	0.000571294	0.243476	0.350254	0.593459	0.0206246	0.00611781	0.80266
	Ttc21b;Wnt1-Cre e11.5
	PHH3 FNP (n=13)			CC3 FNP (n=12)			PHH3 Palate (n=6)			CC3 Palate (n=10)
	Total	Epithelum	Mesenchyme	Total	Epithelum	Mesenchyme	Total	Epithelum	Mesenchyme	Total	Epithelum	Mesenchyme
Average	31.9263	6.6833	25.243	2.69657	0.875829	2.0834	80.2477	27.4539	36.5913	8.37302	3.02198	5.35104
STD	9.78375	3.55645	7.04011	0.836902	0.618703	1.07003	14.1698	15.1216	26.1943	4.52247	3.4581	4.08103
P-value	7.95533e-05	9.32108e-05	0.000151991	0.0339856	0.00610511	0.00362913	0.00120122	0.771347	0.000373824	0.0724667	0.0310446	0.907378
	Ttc21b;Crect e11.5
	PHH3 FNP (n=12)			CC3 FNP (n=12)			PHH3 Palate (n=9)			CC3 Palate (n=12)
	Total	Epithelum	Mesenchyme	Total	Epithelum	Mesenchyme	Total	Epithelum	Mesenchyme	Total	Epithelum	Mesenchyme
Average	73.7663	12.2546	61.5116	41.7761	7.42656	34.3495	133.909	30.7688	103.14	30.5768	20.4861	10.0907
STD	35.8732	7.42462	28.9132	56.8485	9.78938	47.1846	11.7703	10.9072	13.1677	13.8269	10.9449	6.74885
P-value	0.749809	0.230243	0.482293	0.0464168	0.13609	0.0376714	0.00671095	0.758512	0.989247	0.00086063	0.00137388	0.0526469
	Ttc21b;AP2-Cre e11.5
	PHH3 FNP (n=11)			CC3 FNP (n=11)			PHH3 Palate (n=11)			CC3 Palate (n=11)
	Total	Epithelum	Mesenchyme	Total	Epithelum	Mesenchyme	Total	Epithelum	Mesenchyme	Total	Epithelum	Mesenchyme
Average	50.8686	11.1508	39.7179	3.321	1.30775	2.01325	68.3719	22.4767	45.8952	12.8762	6.67481	6.20138
STD	30.7821	5.86566	25.6531	1.86614	1.69638	1.04079	55.9993	18.18	43.2438	5.29489	5.35782	6.17407
P-value	0.119569	0.769194	0.470815	0.152271	0.13579	0.735334	0.0262151	0.314689	0.00508688	0.895681	0.863546	0.756328

## Sheet: e14.5
	Control e14.5
	PHH3 FNP (n=24)					CC3 FNP (n=12)					PHH3 Palate (n=16)			CC3 Palate (n=15)
	Total	Epithelium	Mesenchyme	Nasal Pits	Cartilage	Total	Epithelium	Mesenchyme	Nasal Pits	Cartilage	Total	Epithelium	Mesenchyme	Total	Epithelium	Mesenchyme
Average	44.0829	13.7542	16.328	13.9583	6.48775	8.94022	3.62603	1.97134	5.41667	0.565778	33.0727	10.9284	22.1443	8.37681	1.34589	7.03091
STD	12.4835	4.54155	9.05468	5.64515	3.27723	2.26008	1.89654	1.09958	1.62135	0.548496	18.5276	6.80583	12.644	4.31322	1.83261	3.95514
P-value	N/A	N/A	N/A	N/A	N/A	N/A	N/A	N/A	N/A	N/A	N/A	N/A	N/A	N/A	N/A	N/A
	Kif3a;Wnt1-Cre e14.5
	PHH3 FNP (n=6)					CC3 FNP (n=9)					PHH3 Palate (n=14)			CC3 Palate (n=15)
	Total	Epithelium	Mesenchyme	Nasal Pits	Cartilage	Total	Epithelium	Mesenchyme	Nasal Pits	Cartilage	Total	Epithelium	Mesenchyme	Total	Epithelium	Mesenchyme
Average	54.3566	10.0002	13.1397	43	7.32215	10.3261	5.30251	1.73698	11	0.984103	28.2556	10.2682	17.9874	7.21972	4.71241	2.50732
STD	7.23337	5.43292	2.9624	7.61577	4.44248	4.87869	3.95267	1.33877	4.33013	0.999486	14.3637	5.89231	8.92925	5.04466	4.62958	2.16702
P-value	0.0200311	0.0265864	0.118538	8.2412e-05	0.515994	0.385556	0.204112	0.643967	0.00447763	0.220754	0.43012	0.777936	0.303263	0.505227	0.0172548	0.000814222
	Kif3a;Crect 14.5
	PHH3 FNP (n=6)					CC3 FNP (n=17)					PHH3 Palate (n=14)			CC3 Palate (n=17)
	Total	Epithelium	Mesenchyme	Nasal Pits	Cartilage	Total	Epithelium	Mesenchyme	Nasal Pits	Cartilage	Total	Epithelium	Mesenchyme	Total	Epithelium	Mesenchyme
Average	53.0856	17.2014	25.4995	13	10.498	21.2288	4.36754	11.7736	3.3125	3.38175	67.2261	20.7202	46.5059	22.1048	7.7257	14.3791
STD	4.80712	8.36774	8.91953	5.01996	8.69005	9.90029	2.16438	8.64102	2.98259	3.22307	15.4274	10.2437	13.3707	14.2865	4.1	11.5707
P-value	0.0103766	0.12655	0.00228676	0.693664	0.0770284	0.000165362	0.353493	0.000391653	0.0250268	0.00340311	5.14574e-06	0.00471222	1.49793e-05	0.00126662	6.97494e-06	0.0230343
	Kif3a;AP2-Cre e14.5
	PHH3 FNP (n=14)					CC3 FNP (n=9)					PHH3 Palate (n=12)			CC3 Palate (n=13)
	Total	Epithelium	Mesenchyme	Nasal Pits	Cartilage	Total	Epithelium	Mesenchyme	Nasal Pits	Cartilage	Total	Epithelium	Mesenchyme	Total	Epithelium	Mesenchyme
Average	66.3518	11.2771	16.9049	31.0714	14.4291	14.36	1.78	4.3648	7.66667	2.39465	55.7442	18.1542	37.59	13.3518	7.93547	5.41631
STD	36.0063	7.10906	11.2672	21.6207	7.89069	7.36	1.33097	3.98126	2.44949	1.62221	21.0066	7.20288	14.9397	5.27515	6.14831	5.39832
P-value	0.0410656	0.171993	0.849984	0.0115124	0.000152539	0.0609392	0.00928407	0.0292501	0.0325236	0.000313514	0.00703533	0.0116933	0.00866585	0.0125458	0.00230784	0.382742
	IFT88;Wnt1-Cre e14.5
	PHH3 FNP (n=14)					CC3 FNP (n=14)					PHH3 Palate (n=10)			CC3 Palate (n=14)
	Total	Epithelium	Mesenchyme	Nasal Pits	Cartilage	Total	Epithelium	Mesenchyme	Nasal Pits	Cartilage	Total	Epithelium	Mesenchyme	Total	Epithelium	Mesenchyme
Average	60.453	19.9682	14.9302	37.2143	12.1895	12.3993	3.93921	2.31801	16.7857	0.347247	46.4841	18.4873	27.9968	10.7843	5.11761	5.66669
STD	17.7832	8.65758	6.37511	8.42321	4.18606	3.97385	1.17165	0.807488	6.88564	0.409197	16.8674	6.84891	11.3718	2.69851	1.76578	2.4171
P-value	0.00638554	0.0231085	0.581771	1.31007e-08	0.00023457	0.0113095	0.625599	0.377223	2.73808e-05	0.269463	0.0717022	0.0111823	0.245017	0.0822717	5.45684e-06	0.270348
	IFT88;Crect 14.5
	PHH3 FNP (n=15)					CC3 FNP (n=13)					PHH3 Palate (n=15)			CC3 Palate (n=14)
	Total	Epithelium	Mesenchyme	Nasal Pits	Cartilage	Total	Epithelium	Mesenchyme	Nasal Pits	Cartilage	Total	Epithelium	Mesenchyme	Total	Epithelium	Mesenchyme
Average	32.1028	9.4021	11.9507	8	6.57363	16.5875	4.1393	5.12317	13.0769	0.797574	43.5854	10.5404	33.045	10.6285	3.7367	6.89179
STD	6.53377	3.60109	4.89757	3.87298	1.93968	5.11025	1.43817	2.38029	5.52964	0.785009	11.1357	2.40369	10.6816	3.42521	2.43123	2.25607
P-value	0.000378326	0.00215325	0.0583321	0.000389815	0.918709	0.000139313	0.45724	0.000471273	0.000283452	0.398728	0.0653209	0.832667	0.0146241	0.130239	0.00656973	0.907654
	IFT88;AP2-Cre e14.5
	PHH3 FNP (n=22)					CC3 FNP (n=16)					PHH3 Palate (n=12)			CC3 Palate (n=13)
	Total	Epithelium	Mesenchyme	Nasal Pits	Cartilage	Total	Epithelium	Mesenchyme	Nasal Pits	Cartilage	Total	Epithelium	Mesenchyme	Total	Epithelium	Mesenchyme
Average	33.0478	10.3444	8.89355	16.6364	6.63398	8.07789	2.10771	2.78249	7.25	0.756395	42.9835	12.318	30.6655	10.6223	5.13731	5.48495
STD	9.27976	4.79754	4.5168	9.30717	3.1382	3.83839	0.773106	1.8724	5.48331	0.425263	11.1184	6.34816	8.50158	5.77179	4.84486	3.79503
P-value	0.00139678	0.0171981	0.0010857	0.251288	0.877883	0.464366	0.0206016	0.163996	0.221463	0.364101	0.0908605	0.58701	0.0429523	0.261898	0.0178101	0.302961
	Ttc21b;Wnt1-Cre e14.5
	PHH3 FNP (n=17)					CC3 FNP (n=13)					PHH3 Palate (n=15)			CC3 Palate (n=13)
	Total	Epithelium	Mesenchyme	Nasal Pits	Cartilage	Total	Epithelium	Mesenchyme	Nasal Pits	Cartilage	Total	Epithelium	Mesenchyme	Total	Epithelium	Mesenchyme
Average	58.1626	18.0911	19.2568	27.6471	8.26717	7.01194	2.82874	1.8535	5	0.112589	53.7406	18.1974	35.5432	12.4789	10.1865	2.29244
STD	18.1872	7.79274	6.25219	7.14966	2.95194	2.03066	1.27966	0.9984	2.3094	0.298187	9.80749	8.09587	9.27053	8.1345	6.81055	2.28027
P-value	0.0102739	0.0505424	0.227895	3.18365e-07	0.077547	0.0356243	0.236585	0.782244	0.604787	0.0214858	0.000690055	0.0118174	0.00219171	0.120719	0.000505006	0.000650458
	Ttc21b;Crect 14.5
	PHH3 FNP (n=19)					CC3 FNP (n=14)					PHH3 Palate (n=14)			CC3 Palate (n=14)
	Total	Epithelium	Mesenchyme	Nasal Pits	Cartilage	Total	Epithelium	Mesenchyme	Nasal Pits	Cartilage	Total	Epithelium	Mesenchyme	Total	Epithelium	Mesenchyme
Average	50.34	15.2838	18.5202	17.1053	5.7147	5.33994	2.32777	1.19197	2.42857	0.310637	39.1475	9.32637	29.8211	8.48198	4.44252	4.03946
STD	13.8025	6.94545	6.43069	5.32181	2.57316	1.56316	0.851541	0.554012	1.50457	0.410326	21.7418	6.29375	16.4833	3.70697	2.4781	3.41358
P-value	0.13225	0.413334	0.35941	0.0682347	0.391276	0.000172457	0.0450471	0.0411201	5.75836e-05	0.200099	0.421139	0.508633	0.169531	0.944274	0.00086825	0.0387131
	Ttc21b;AP2-Cre e14.5
	PHH3 FNP (n=12)					CC3 FNP (n=11)					PHH3 Palate (n=12)			CC3 Palate (n=10)
	Total	Epithelium	Mesenchyme	Nasal Pits	Cartilage	Total	Epithelium	Mesenchyme	Nasal Pits	Cartilage	Total	Epithelium	Mesenchyme	Total	Epithelium	Mesenchyme
Average	49.9632	15.5885	15.3665	17.0833	10.3278	8.65517	3.78312	2.10708	3.90909	0.378703	38.7117	10.5809	28.1308	5.96742	3.72692	4.67606
STD	10.515	4.62139	5.01698	8.12917	2.93511	2.19829	1.58659	1.05531	1.70027	0.554458	11.684	4.52359	9.3105	1.9483	5.14941	3.70201
P-value	0.118627	0.271167	0.684824	0.24887	0.00156751	0.762259	0.831036	0.765609	0.0417057	0.425418	0.334326	0.872582	0.161017	0.0723145	0.168376	0.133539
